# Supplementary material for: New Tests to Measure Individual Differences in Matching and Labelling Facial Expressions of Emotion, and Their Association with Ability to Recognise Vocal Emotions and Facial Identity
Source: PubMed Central journal article supplement (PMC3695959; doi:10.1371/journal.pone.0068126), 2013-06-28
Supplement: pone.0068126.s003.pdf [file pone.0068126.s003.pdf]

**Results S3. Reliability for separate expressions in the 144-item and 100-item emotion-matching and –labelling tasks.**

**Table A.** Cronbach’s alpha ( $\alpha$ ) for each of the separate expressions in the 144-item and 100-item emotion-matching tests.

| Expression | 144-item test (N = 80) |               |          |         | 100-item test (N = 243) <sup>a</sup> |               |          |         |
|------------|------------------------|---------------|----------|---------|--------------------------------------|---------------|----------|---------|
|            | Range (%)              | M (SD)        | $\alpha$ | # items | Range (%)                            | M (SD)        | $\alpha$ | # items |
| Anger      | 58.33–100              | 79.74 (10.16) | 0.50     | 24      | 35.00–100                            | 77.65 (11.34) | 0.48     | 20      |
| Disgust    | 33.33–91.67            | 65.05 (12.66) | 0.52     | 24      | 21.43–100                            | 61.96 (15.66) | 0.41     | 14      |
| Fear       | 33.33–87.50            | 67.03 (10.15) | 0.29     | 24      | 25.00–100                            | 67.22 (14.03) | 0.21     | 12      |
| Happiness  | 62.50–100              | 87.24 (8.13)  | 0.41     | 24      | 40.91–100                            | 84.14 (11.03) | 0.59     | 22      |
| Sadness    | 45.83–87.50            | 67.40 (10.01) | 0.27     | 24      | 29.41–100                            | 65.04 (13.46) | 0.43     | 17      |
| Surprise   | 58.33–95.83            | 78.13 (8.42)  | 0.20     | 24      | 33.33–100                            | 77.96 (11.64) | 0.36     | 15      |

<sup>a</sup> Sample consists of N = 80 reported in the main text and N = 163 who completed the 100-item matching test reported in Supplementary Materials C.

**Table B.** Cronbach’s alpha ( $\alpha$ ) for each of the separate expressions in the 144-item and 100-item emotion-labelling tests.

| Expression | 144-item test (N = 80) |               |          |         | 100-item test (N = 80) |               |          |         |
|------------|------------------------|---------------|----------|---------|------------------------|---------------|----------|---------|
|            | Range (%)              | M (SD)        | $\alpha$ | # items | Range (%)              | M (SD)        | $\alpha$ | # items |
| Anger      | 41.67–95.83            | 79.11 (11.65) | 0.65     | 24      | 35.00–100              | 83.56 (12.38) | 0.68     | 20      |
| Disgust    | 16.67–87.50            | 57.55 (14.45) | 0.66     | 24      | 14.29–100              | 72.77 (18.28) | 0.66     | 14      |
| Fear       | 4.17–91.67             | 49.06 (16.48) | 0.72     | 24      | 8.33–100               | 64.38 (20.92) | 0.67     | 12      |
| Happiness  | 75.00–100              | 95.99 (5.29)  | 0.49     | 24      | 72.73–100              | 96.59 (5.31)  | 0.52     | 22      |
| Sadness    | 54.17–100              | 80.31 (10.92) | 0.62     | 24      | 47.06–100              | 83.60 (13.11) | 0.65     | 17      |
| Surprise   | 50.00–100              | 82.08 (11.48) | 0.62     | 24      | 53.33–100              | 86.75 (12.18) | 0.54     | 15      |

*Note:* Not all the items in the 144-item tests are considered valid depictions of the intended emotion.
